# Supplementary material
Source: Springer Nature journal article supplement (https://www.springerprofessional.de/resource/supplementary/40095_2012_54_MOESM15_ESM.pdf/11899712)
Supplement: MOESM15 [file 11899712]

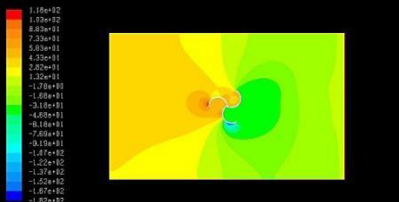

Contours of Static Pressure (pascal) Mar 16, 2019  
FLUENT 6.3 (2d, dp, p6mm, s1e1)

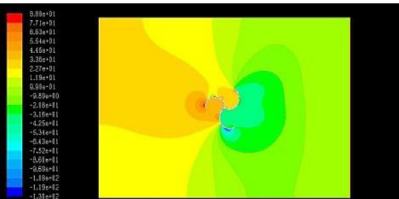

Contours of Static Pressure (pascal) Mar 16, 2019  
FLUENT 6.3 (2d, dp, p6mm, s1e1)

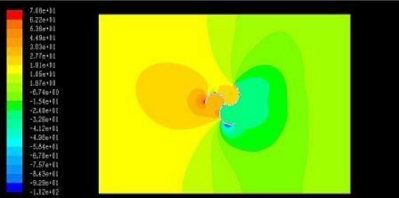

Contours of Static Pressure (pascal) Mar 16, 2019  
FLUENT 6.3 (2d, dp, p6mm, s1e1)

**a**

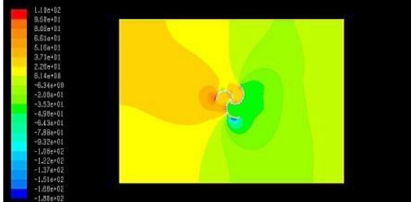

Contours of Static Pressure (pascal) Mar 16, 2019  
FLUENT 6.3 (2d, dp, p6mm, s1e1)

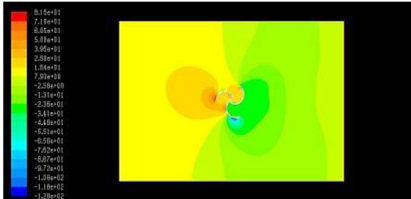

Contours of Static Pressure (pascal) Mar 16, 2019  
FLUENT 6.3 (2d, dp, p6mm, s1e1)

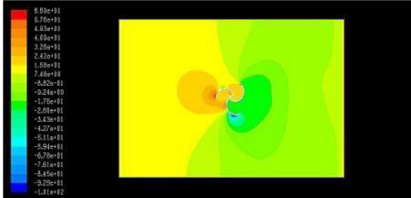

Contours of Static Pressure (pascal) Mar 16, 2019  
FLUENT 6.3 (2d, dp, p6mm, s1e1)

**b**

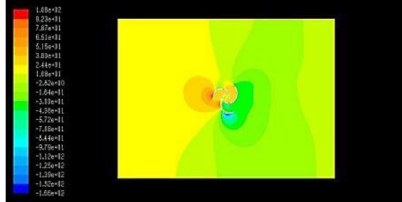

Contours of Static Pressure (pascal) Mar 16, 2019  
FLUENT 6.3 (2d, dp, p6mm, s1e1)

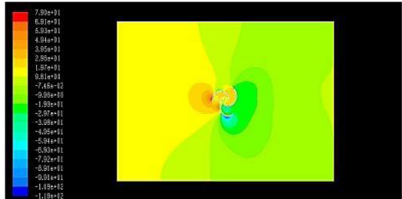

Contours of Static Pressure (pascal) Mar 16, 2019  
FLUENT 6.3 (2d, dp, p6mm, s1e1)

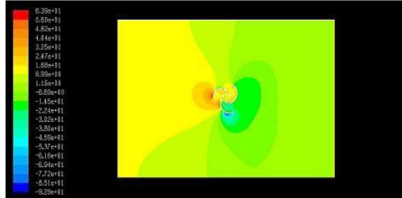

Contours of Static Pressure (pascal) Mar 16, 2019  
FLUENT 6.3 (2d, dp, p6mm, s1e1)

**c**
